# Supplementary material for: Evidence that the tumor-suppressor protein BRCA2 does not regulate cytokinesis in human cells
Source: Oxford University Press journal article supplement (doi:10.1242/jcs.068015), 2010-04-01
Supplement: jcs068015-sup-068015figs1.pdf [file jcs068015-sup-068015figs1.pdf]

wtBRCA2 (3418aa)

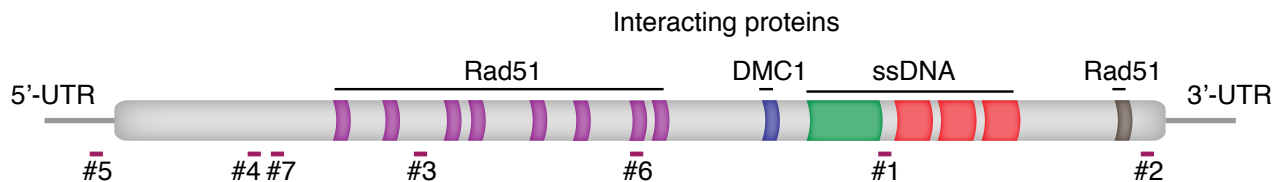

-  BRC motif
-  PhePP motif
-  Helical domain
-  OB fold
-  TR2 region
-  siRNA target position

BRCA2 siRNAs

- #1 Invitrogen (BRCA2HSS101097)
- #2 Qiagen (SI02653434)
- #3 Dharmacon (J-003462-05)
- #4 Invitrogen (BRCA2HSS101096)
- #5 Qiagen (SI02653595)
- #6 Dharmacon (J-003462-06)
- #7 Dharmacon (J-003462-07)
