# Supplementary figures and images for: Evidence that the tumor-suppressor protein BRCA2 does not regulate cytokinesis in human cells
Source: Oxford University Press journal article supplement (doi:10.1242/jcs.068015), 2010-04-01

**A**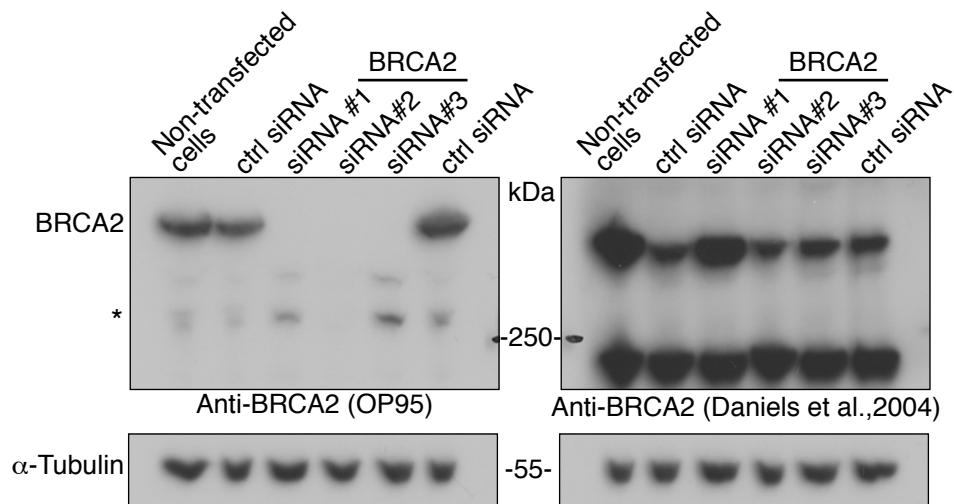**B**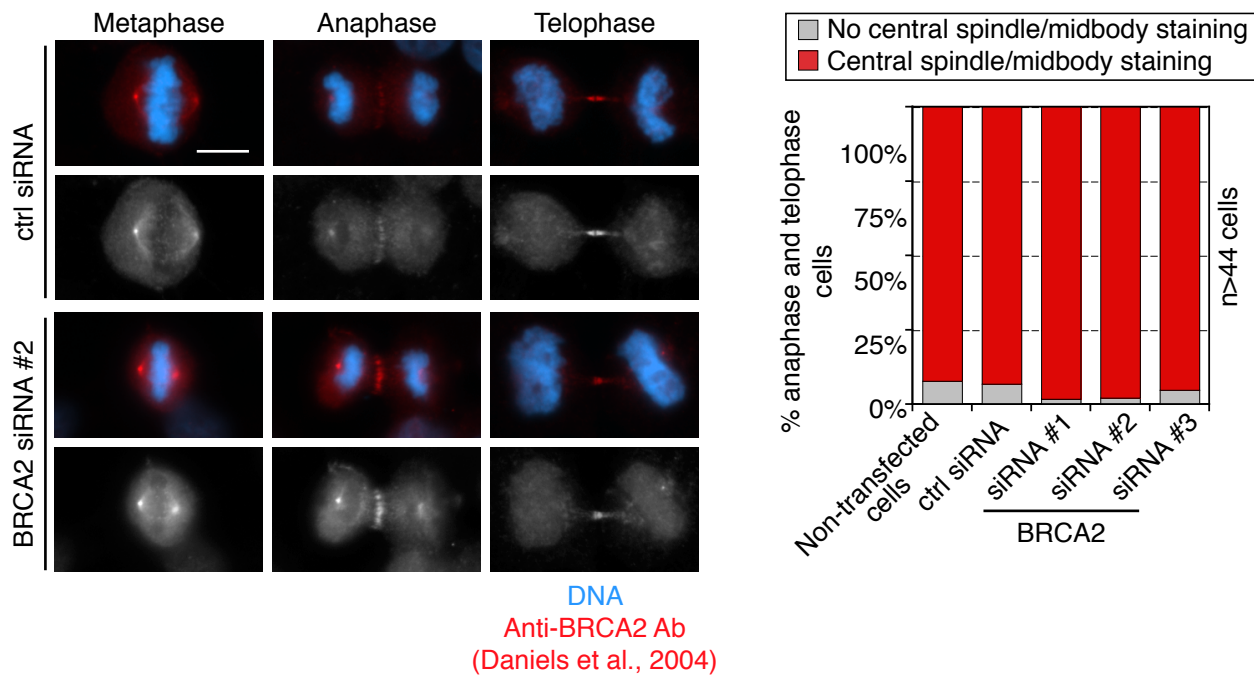

Supplement: jcs068015-sup-068015figs2.pdf [file jcs068015-sup-068015figs2.pdf]

**A**

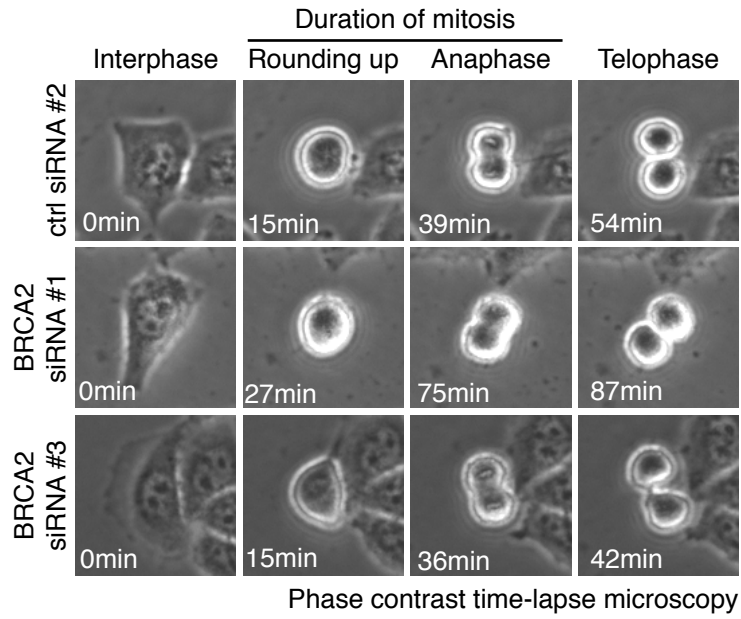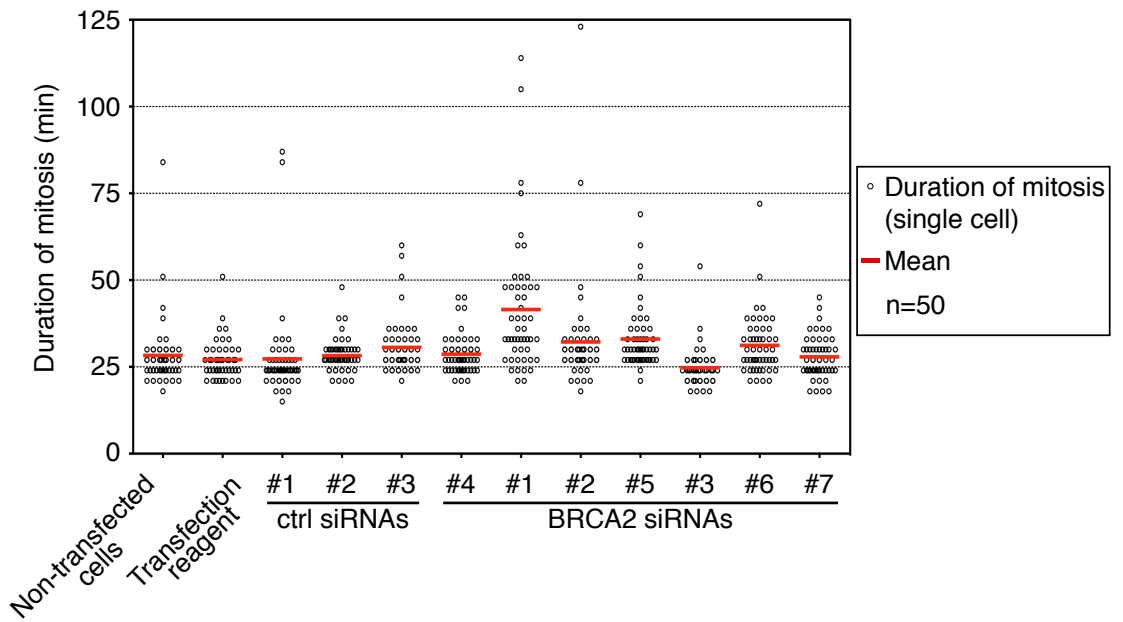

**B**

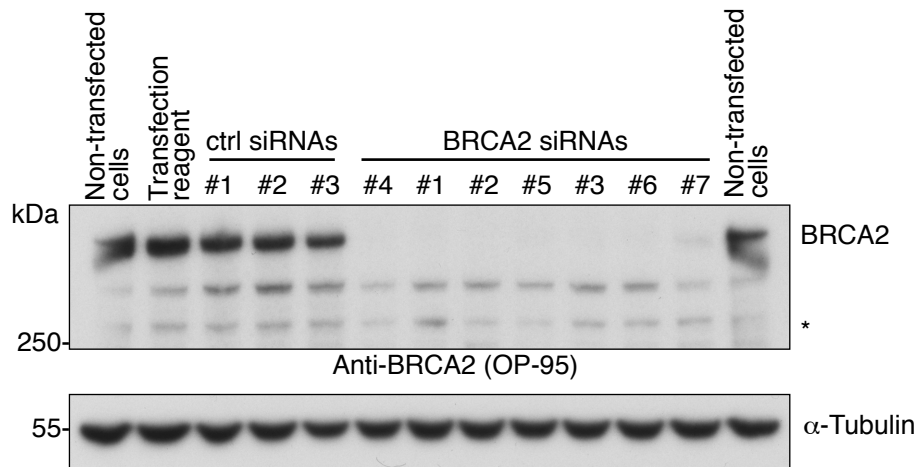

Supplement: jcs068015-sup-068015figs3.pdf [file jcs068015-sup-068015figs3.pdf]
